# Supplementary material
Source: publisher site journal article supplement (https://www.spandidos-publications.com/3419/downloadSupplementary)

Figure S1. SAL increases endothelial cell viability and decreases LDH leakage. (A) The effect of 0, 0.01, 0.1, 0.5 and 1 mmol/l Hcy on cell viability was detected using an MTT assay. (B) Effect of 1 mmol/l Hcy on cell viability was detected using an MTT assay for 0, 6, 12, 24 and 48 h. (C) Effect of 1 mmol/l Hcy incubated with SAL (10, 50 or 250  $\mu$ mol/l) for 48 h on cell viability, as detected via an MTT assay. (D) LDH leakage test was used to detect the degree of cell membrane damage after incubation with 1 mmol/l Hcy and SAL (10, 50 or 250  $\mu$ mol/l) for 48 h. Data are presented as the mean  $\pm$  SD.  $n=3$  for each group. \* $P<0.05$ , \*\* $P<0.01$  vs. control; # $P<0.05$  vs. Hcy. LDH, lactate dehydrogenase; SAL, salidroside; Hcy, homocysteine.

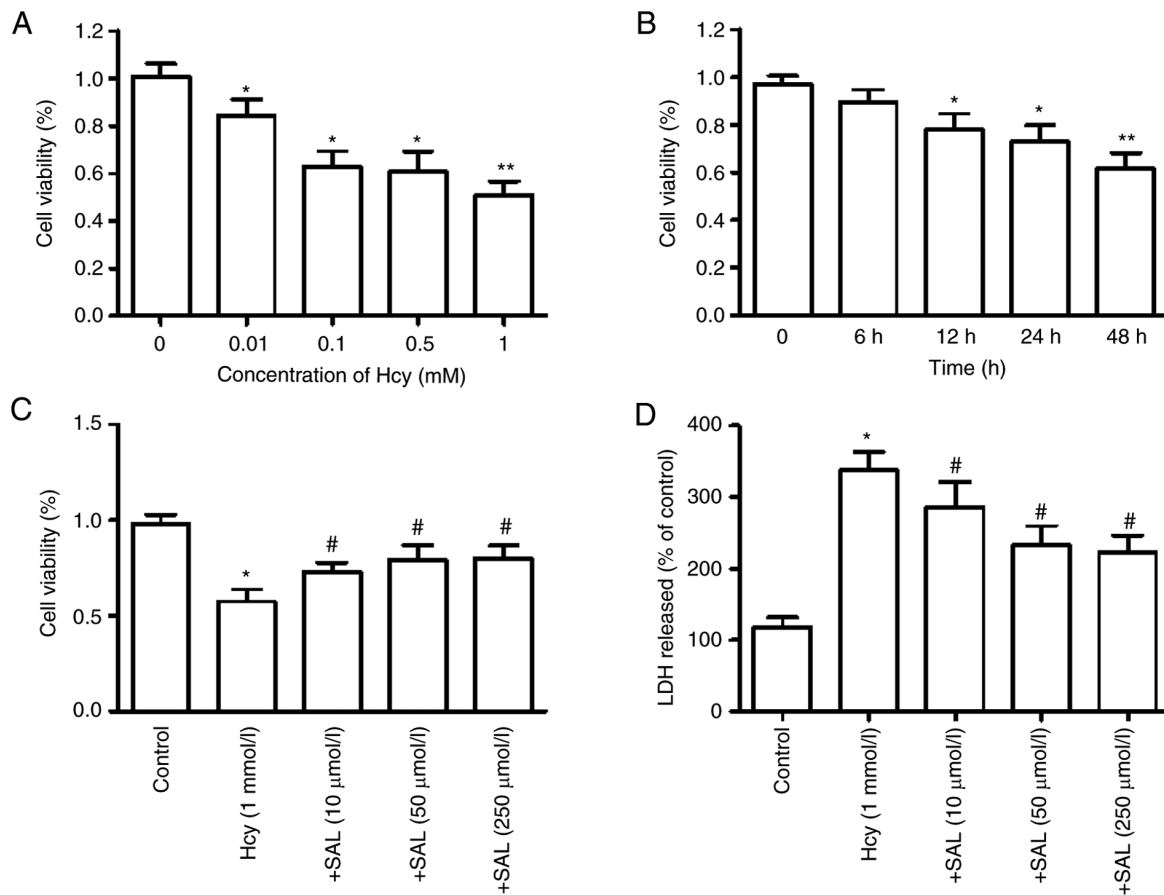

Supplement: Supplementary file 1 [file downloadSupplementary]
